# Supplementary material for: Trends and Disparities in Valvular Heart Disease Mortality in the United States From 1999 to 2020
Source: PubMed Central journal article supplement — J Am Heart Assoc. 2024 Apr 8;13(8):e030895. doi: 10.1161/JAHA.123.030895 (PMC11262520; doi:10.1161/jaha.123.030895), 2024-04-08
Supplement: JAH3-13-e030895-s001.pdf [file JAH3-13-e030895-s001.pdf]

# **SUPPLEMENTAL MATERIAL**

**Figure S1. Trends in Age-adjusted Mortality Rates of Valvular Heart Diseases, Stratified by Urbanization, between 1999 and 2020.**

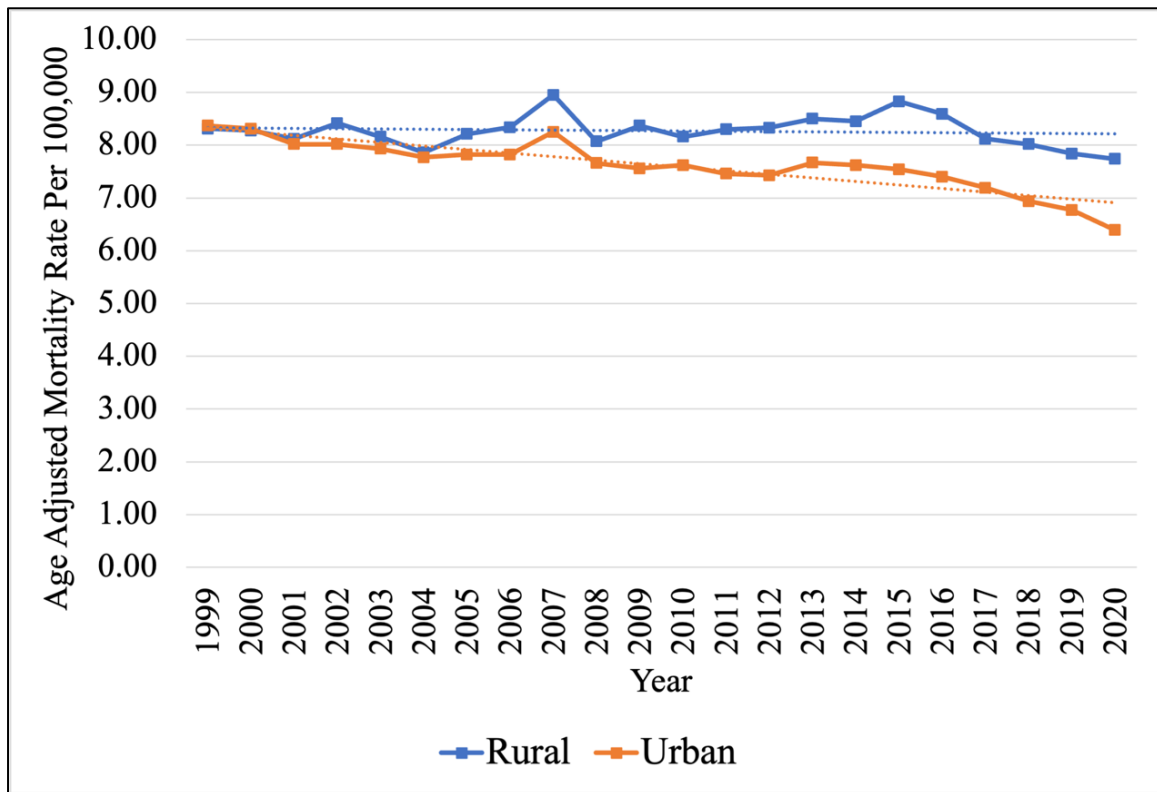

**Figure S2. Trends in Age-adjusted Mortality Rates of Infective Endocarditis, Stratified by Sex Groups, between 1999 and 2020.**

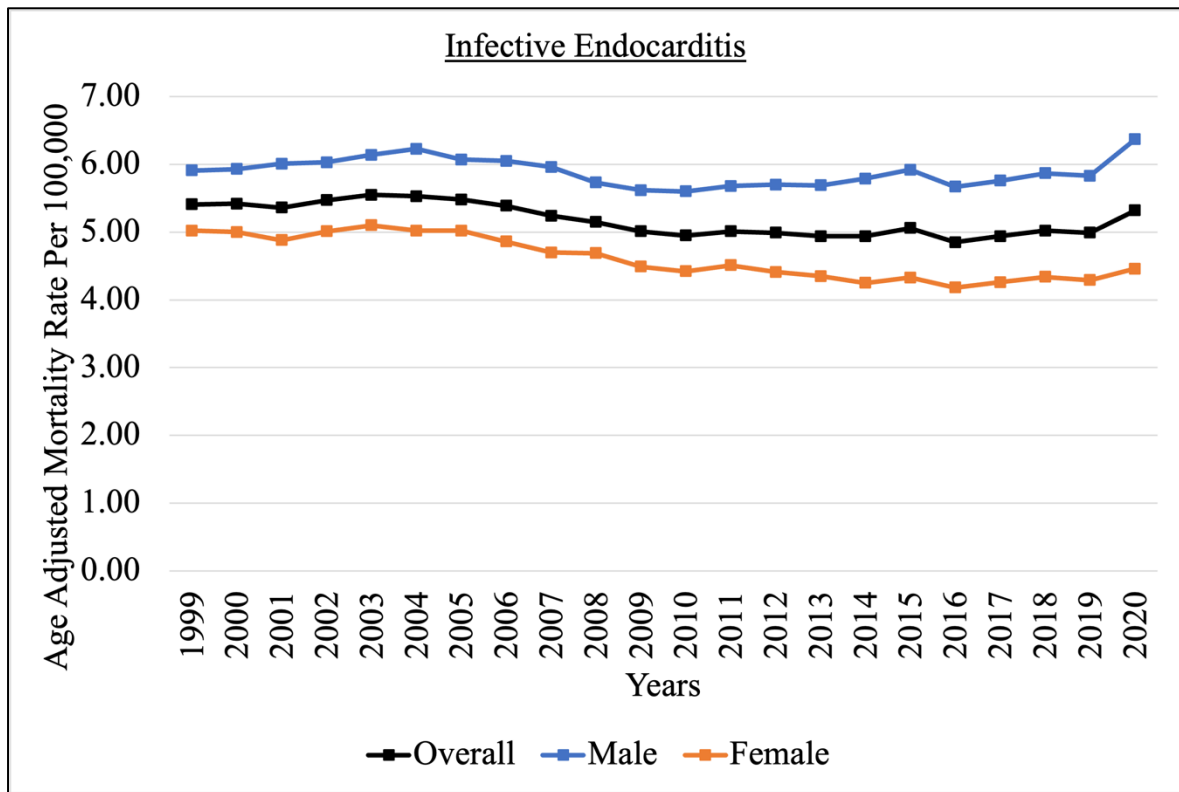

**Figure S3. Annual Volume of Surgical Aortic Valve Replacement (SAVR) and Transcatheter Aortic Valve Replacement (TAVR). [20]**

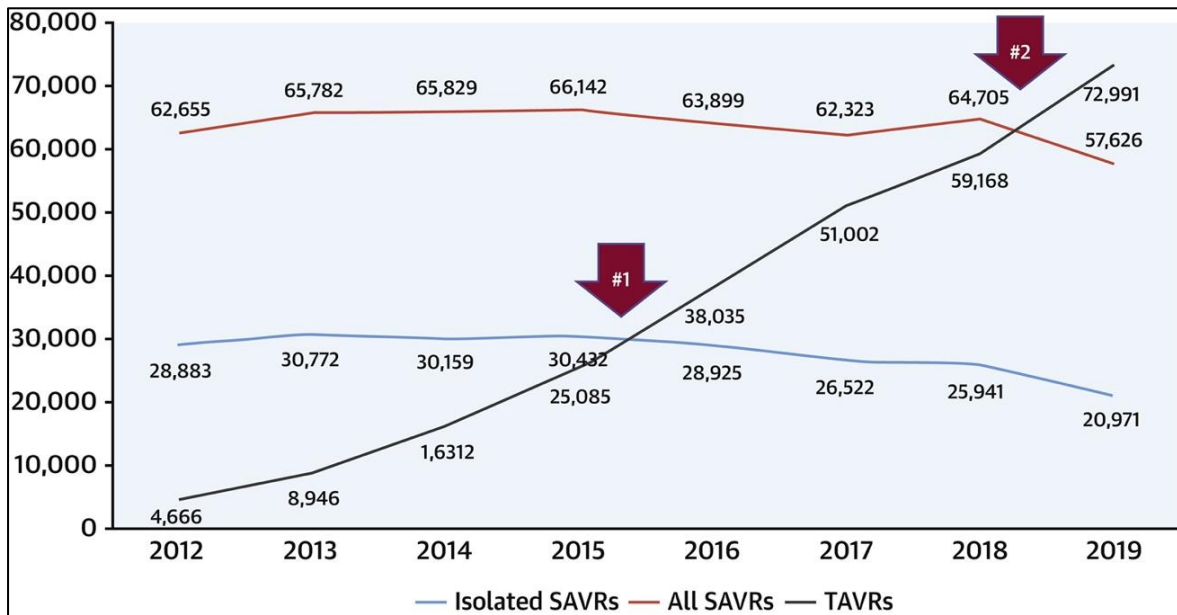

\*SAVR: Surgical Aortic Valve Replacement, TAVR: Transcatheter Aortic Valve Replacement

Figure S4. Annual Volume of Transcatheter Edge-to-edge Repair (TEER). [38]

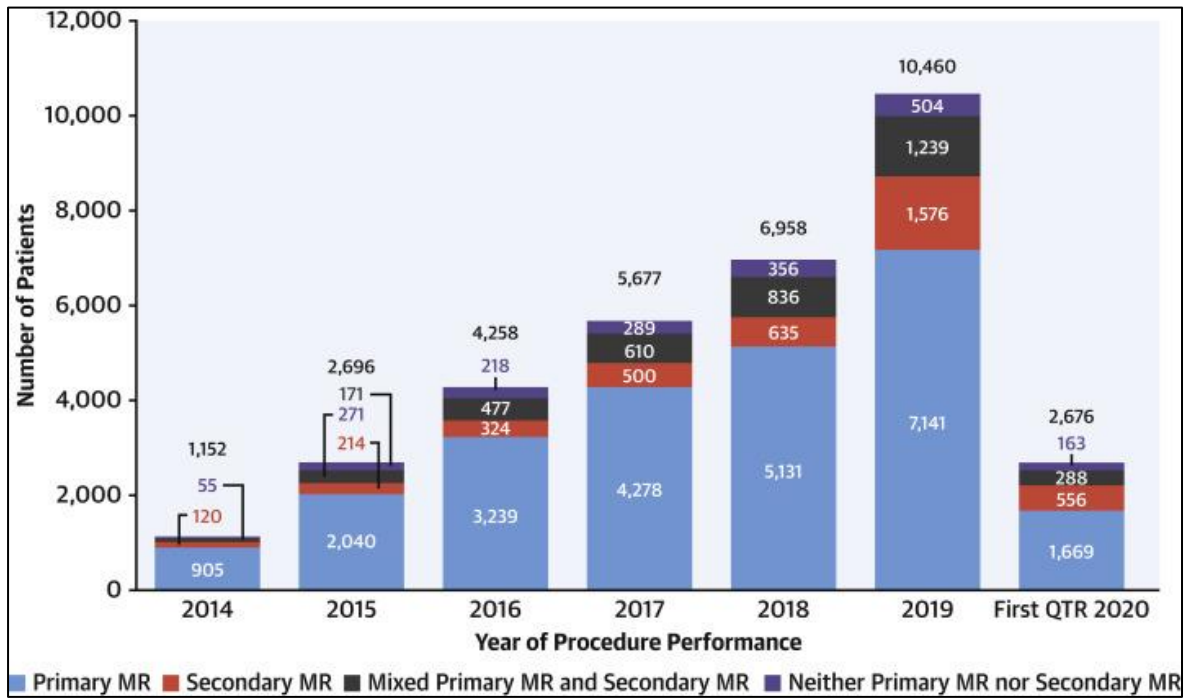

\*MR: Mitral Regurgitation, QTR: Quarter

Figure S5. Annual Volume of Transcatheter Mitral Valve Replacement (TMVR). [38]

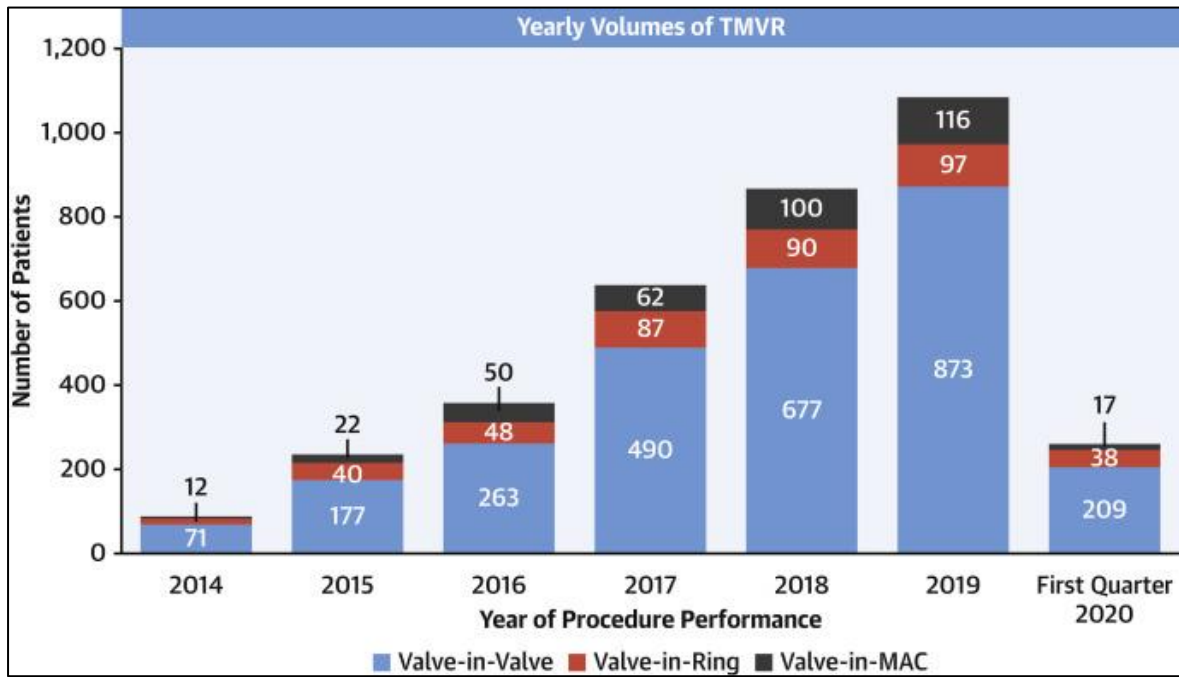

\*MAC: Mitral Annular Calcification, TMVR: Transcatheter Mitral Valve Replacement
